# Supplementary material for: The photo-dissociation of the pyrrole–ammonia complex—the role of hydrogen bonding in Rydberg states photochemistry
Source: Royal Society of Chemistry journal article supplement (doi:10.1039/c2cp23849g), 2012-01-01

## Supporting Information

Scheme S1 Active Space of Pyrrole Ammonia complex:  
6 occupied MO (18-23) and 4 unoccupied (24-27)

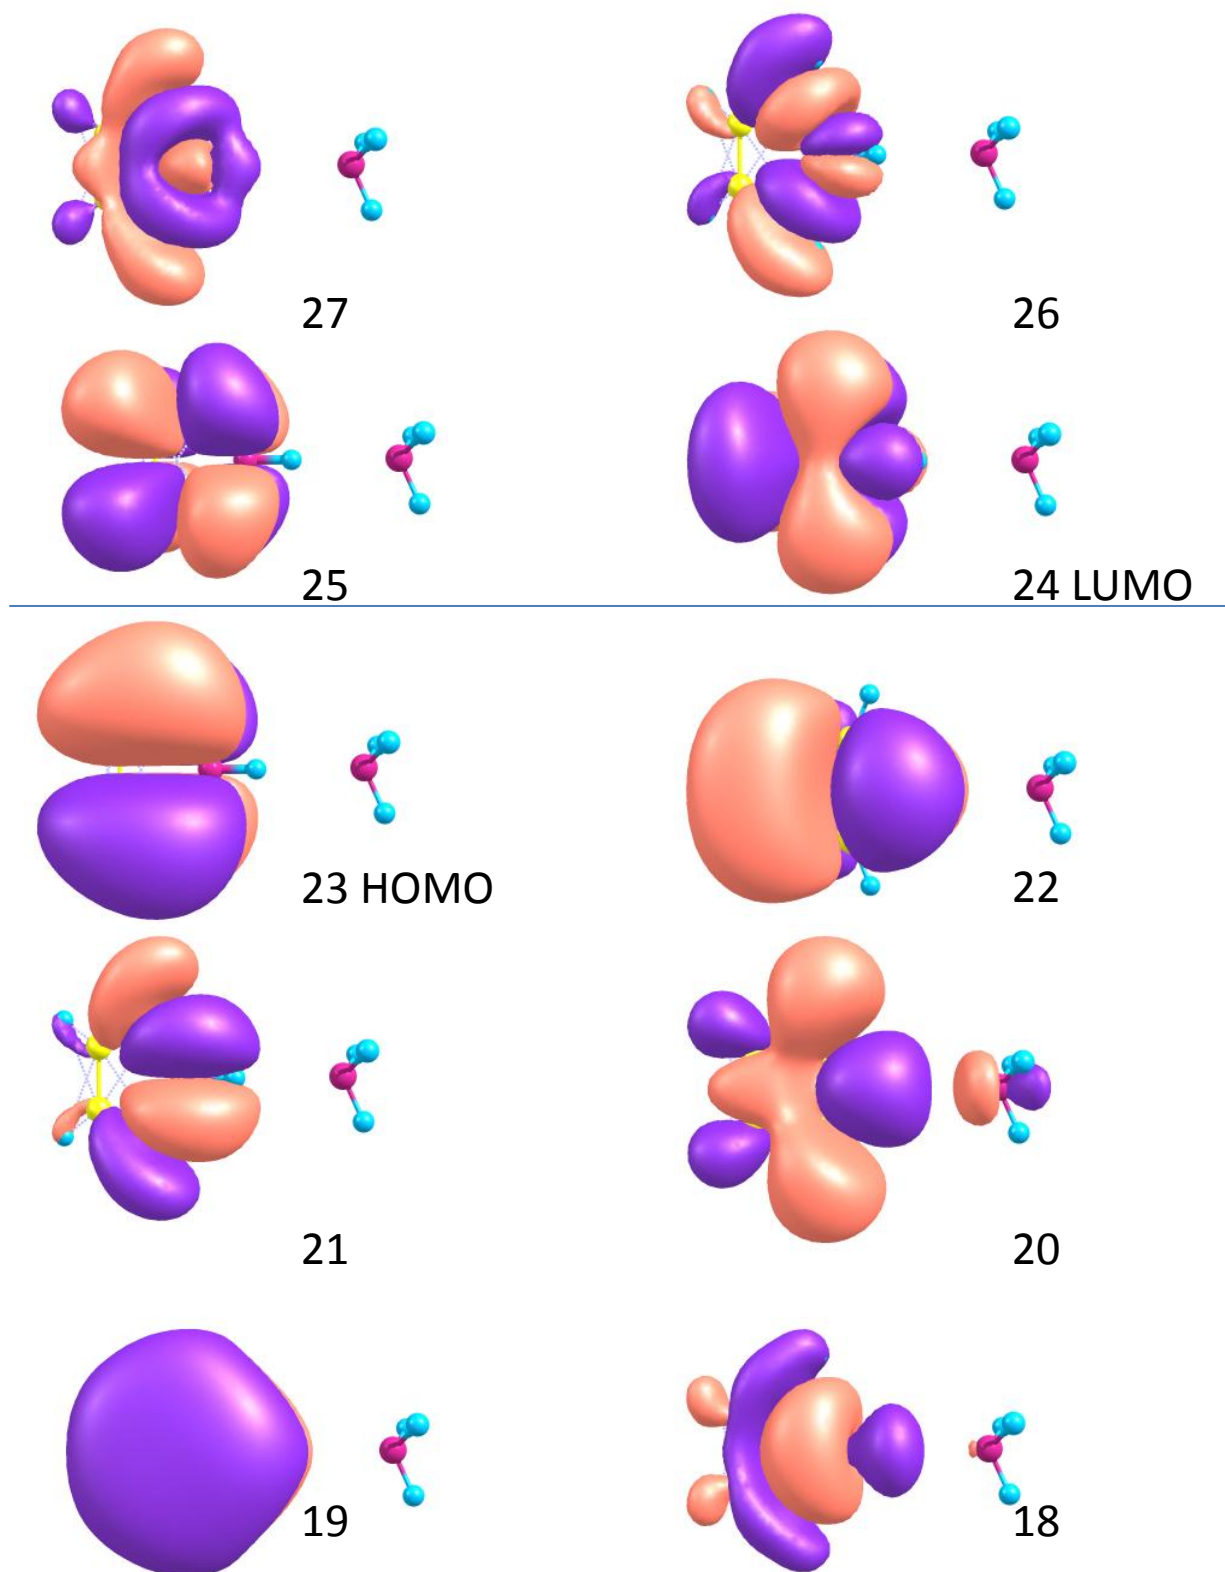

Supplement: c2cp23849g.pdf [file c2cp23849g.pdf]
